# Supplementary material for: Identification of Autophagy as a Functional Target Suitable for the Pharmacological Treatment of Mitochondrial Membrane Protein-Associated Neurodegeneration (MPAN) In Vitro
Source: Pharmaceutics. 2023 Jan 12;15(1):267. doi: 10.3390/pharmaceutics15010267 (PMC9862353; doi:10.3390/pharmaceutics15010267)
Supplement: Supplementary file 1 [file pharmaceutics-15-00267-s001.zip › pharmaceutics-2089522-supplementary.pdf]

**Table S1. List of primary skin fibroblasts derived from MPAN patients and carriers.**

From left to right, columns indicate in order: 1. Numerical ID assigned to each fibroblast cell line; 2. Pedigree ID in case of fibroblasts from patients and carriers belonging to the same family; 3. Relation to the index and form of MPAN: autosomal recessive (AR) or autosomal dominant (AD); 4. Protein variants in C19orf12.

| Fibroblast ID | Pedigree | Relationship to index                                | Protein variant in C19orf12        |
|---------------|----------|------------------------------------------------------|------------------------------------|
| 45966         |          | index (AR)                                           | p.[Ala67Glyfs*16];[Ala67Glyfs*16]  |
| 46572         |          | index (AR)                                           | p. [Thr11Met];[Gly69Argfs*10]      |
| 48869         |          | index (AR)                                           | p. [Asp18Gly];[Leu132Gln]          |
| 106298        | NBIA384  | index (AR)                                           | p. [Gly65Val];[Gly65Val]           |
| 106299        |          | affected relative (AR)                               | p. [Gly65Val];[Gly65Val]           |
| 106300        |          | affected relative (AR)                               | p. [Gly65Val];[Gly65Val]           |
| 118245        |          | unaffected carrier                                   | p. [Gly65Val];[=]                  |
| 118246        |          | unaffected carrier                                   | p. [Gly65Val];[=]                  |
| 116351        | NBIA515  | index (AR)                                           | p.[Gln97Pro];[Gly69Argfs*10]       |
| 120563        |          | unaffected carrier                                   | p.[Gln97Pro];[=]                   |
| 120564        |          | unaffected carrier                                   | p.[Gly69Argfs*10];[=]              |
| 116636        | NBIA510  | index (AR)                                           | p. [Gly69Argfs*10];[Gly69Argfs*10] |
| 118373        |          | unaffected carrier                                   | p. [Gly69Argfs*10];[=]             |
| 118374        |          | unaffected carrier                                   | p. [Gly69Argfs*10];[=]             |
| 116637        |          | index (AR)                                           | p. [Gly69Argfs*10];[Gly69Argfs*10] |
| 116638        |          | index (AR)                                           | p. [Gly69Argfs*10];[Gly69Argfs*10] |
| 116641        |          | index (AR)                                           | p. [Gly69Argfs*10];[Gly69Argfs*10] |
| 116642        |          | index (AR)                                           | p. [Gly69Argfs*10];[Gly69Argfs*10] |
| 116643        |          | index (AR)                                           | p. [Gly69Argfs*10];[Gly69Argfs*10] |
| 116673        |          | index (AR)                                           | p. [Gly69Argfs*10];[Gly69Argfs*10] |
| 117912        |          | index (AR)                                           | p.[Gly58Ser]; [Gly58Ser]           |
| 118375        | NBIA#027 | index (AR)                                           | p. [Thr11Met];[Gly69Argfs*10]      |
| 118376        |          | unaffected carrier                                   | p. [Thr11Met];[=]                  |
| 118377        |          | unaffected carrier                                   | p.[Gly69Argfs*10];[=]              |
| 128054        |          | index (AD)                                           | p.Ala94Serfs*24                    |
| 128055        |          | index (AD)                                           | p.Met76Thrfs*3                     |
| NHDF          |          | Healthy individual                                   | p. [=];[=]                         |
| 33281         |          | Undiagnosed mitochondrial patient,<br>PMID: 22499348 | p. [=];[=]                         |

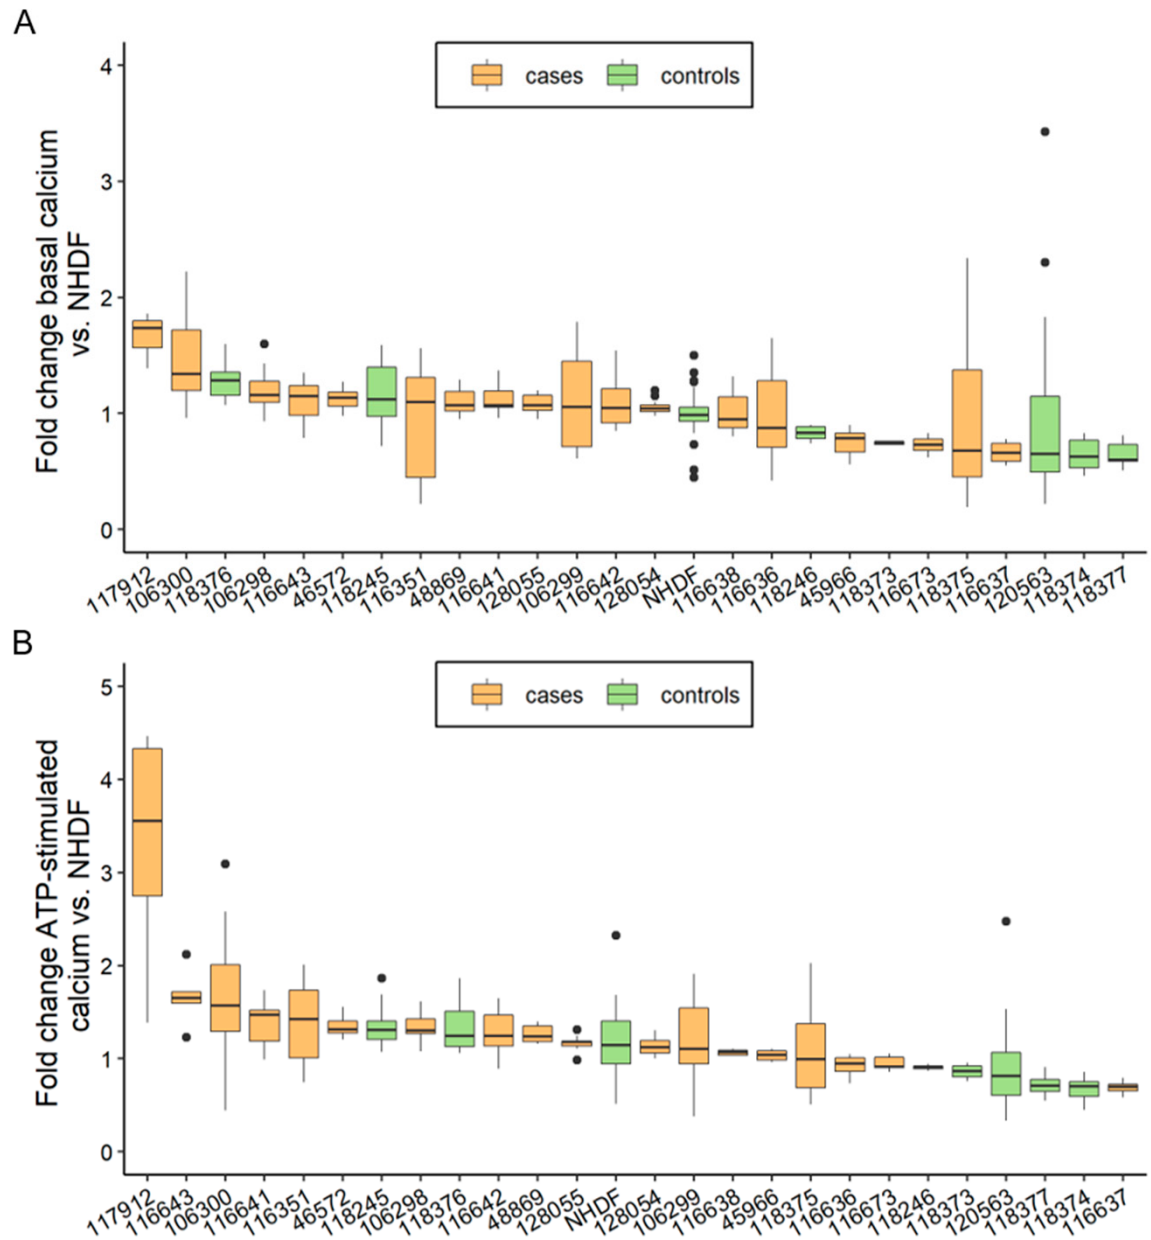

**Figure S1. Intracellular calcium in individual fibroblasts.** Box plots refer to individual cell line values of relative fluorescence. Relative fold changes in patients and controls are normalized to the protein-normalized average fluorescence of NHDF cells in standard growth conditions. Data are presented by decreasing medians before (A) and after ATP stimulation (B). Numbers of replicates: patients and carriers  $n=10-40$ ; NHDF  $n=50$ .  $p$  values were calculated with an independent sample  $t$ -test. All  $p$  values were two-sided with a significance level of 0.05.

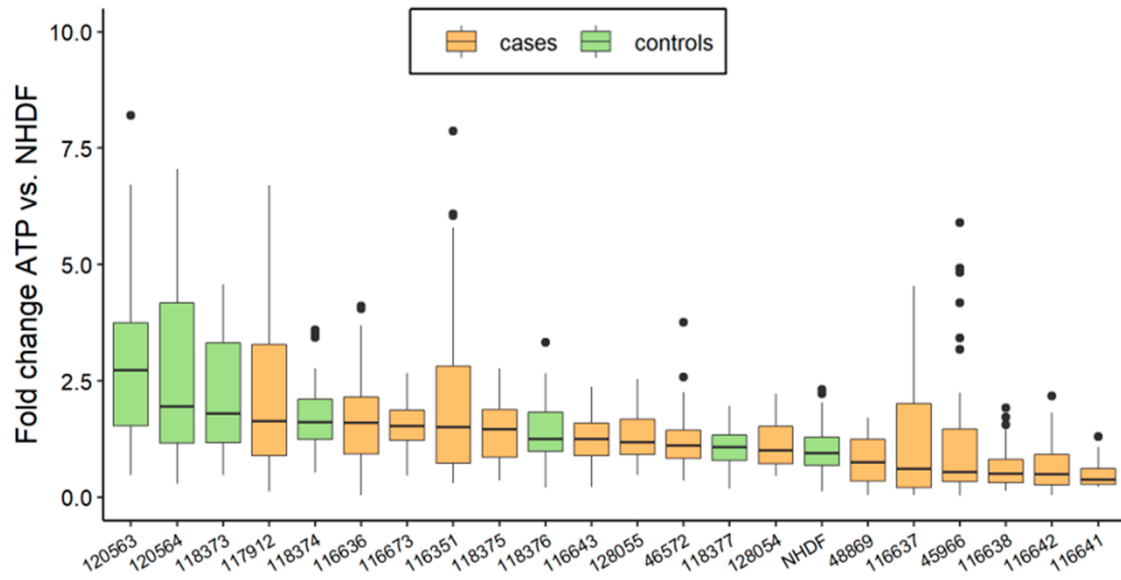

**Figure S2. Total cellular ATP in individual fibroblasts.** Box plots refer to individual cell line values of relative luminescence. Relative fold changes in patients and controls are normalized to the protein-normalized average luminescence of NHDF cells. Data are presented by decreasing medians. Numbers of replicates: patients and carriers n=10-40; NHDF n=50. p values were calculated with an independent sample t-test. All p values were two-sided with a significance level of 0.05.

A

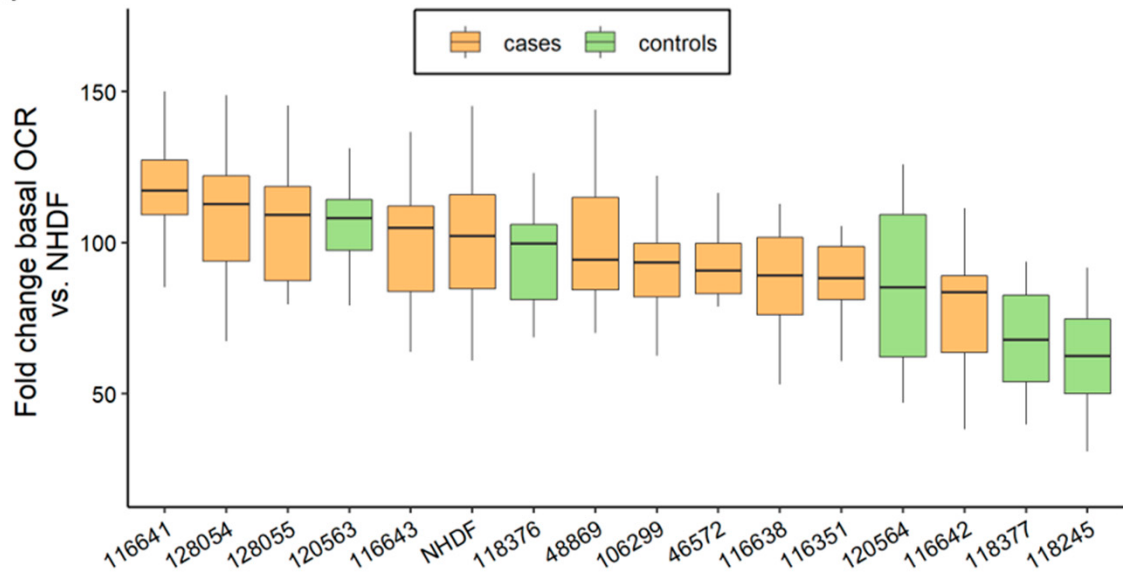

B

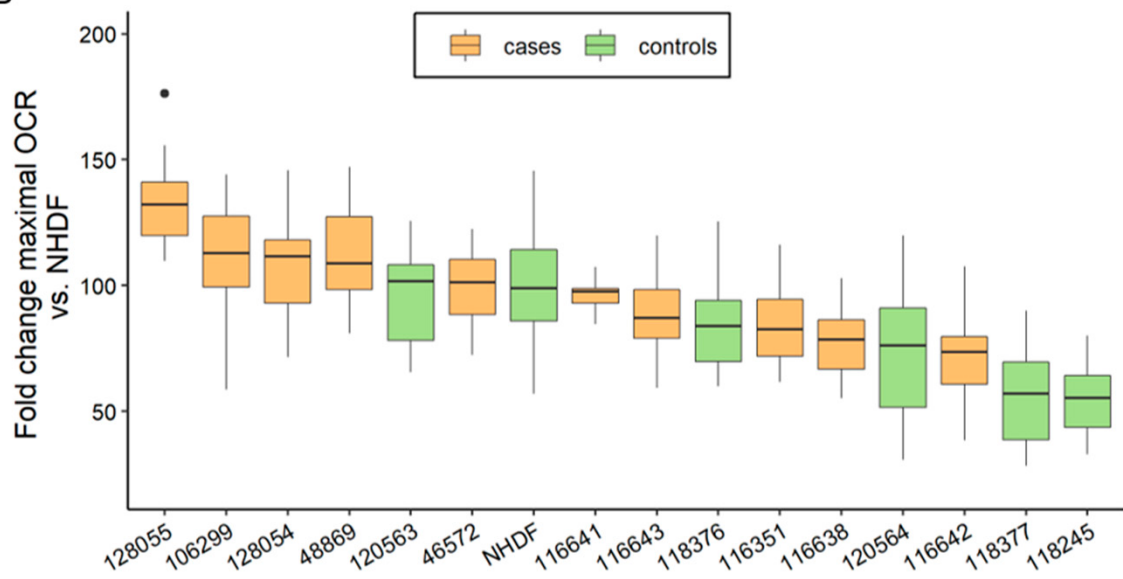

C

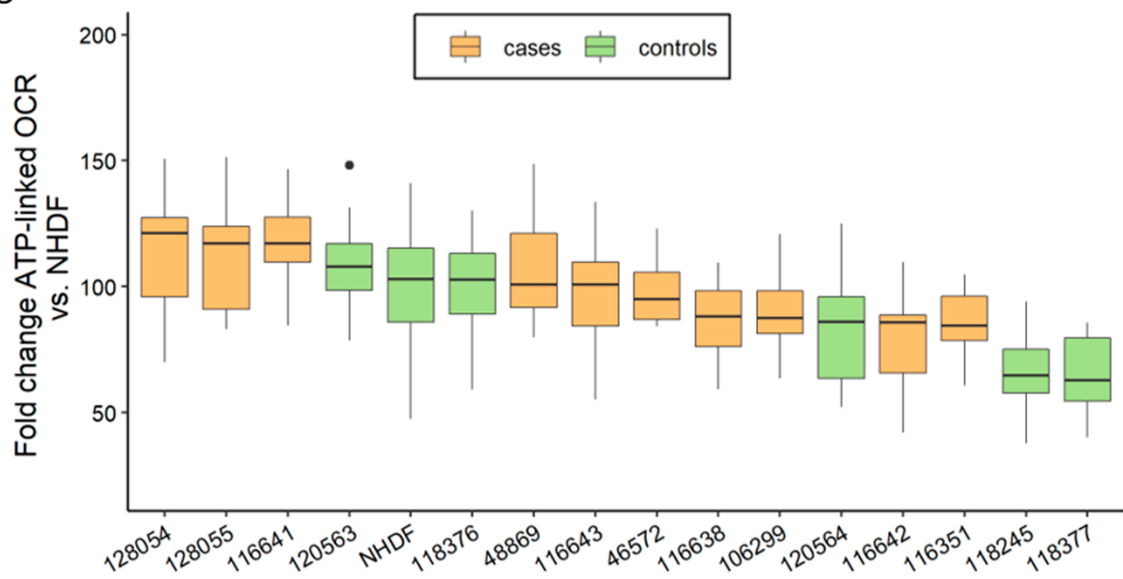

**Figure S3. Mitochondrial bioenergetics by Seahorse assay in individual fibroblasts.** Box plots refer to individual cell line values of OCR. Relative fold changes in patients and controls are normalized to the cell number-normalized average OCR of NHDF cells. Data are presented by decreasing medians. Data show results of basal (A) and maximal respiration after stimulation with CCCP (B) and ATP-linked respiration (C). Numbers of replicates: patients and carriers n=10-40; NHDF n=50. p values were calculated with an independent sample t-test. All p values were two-sided with a significance level of 0.05.

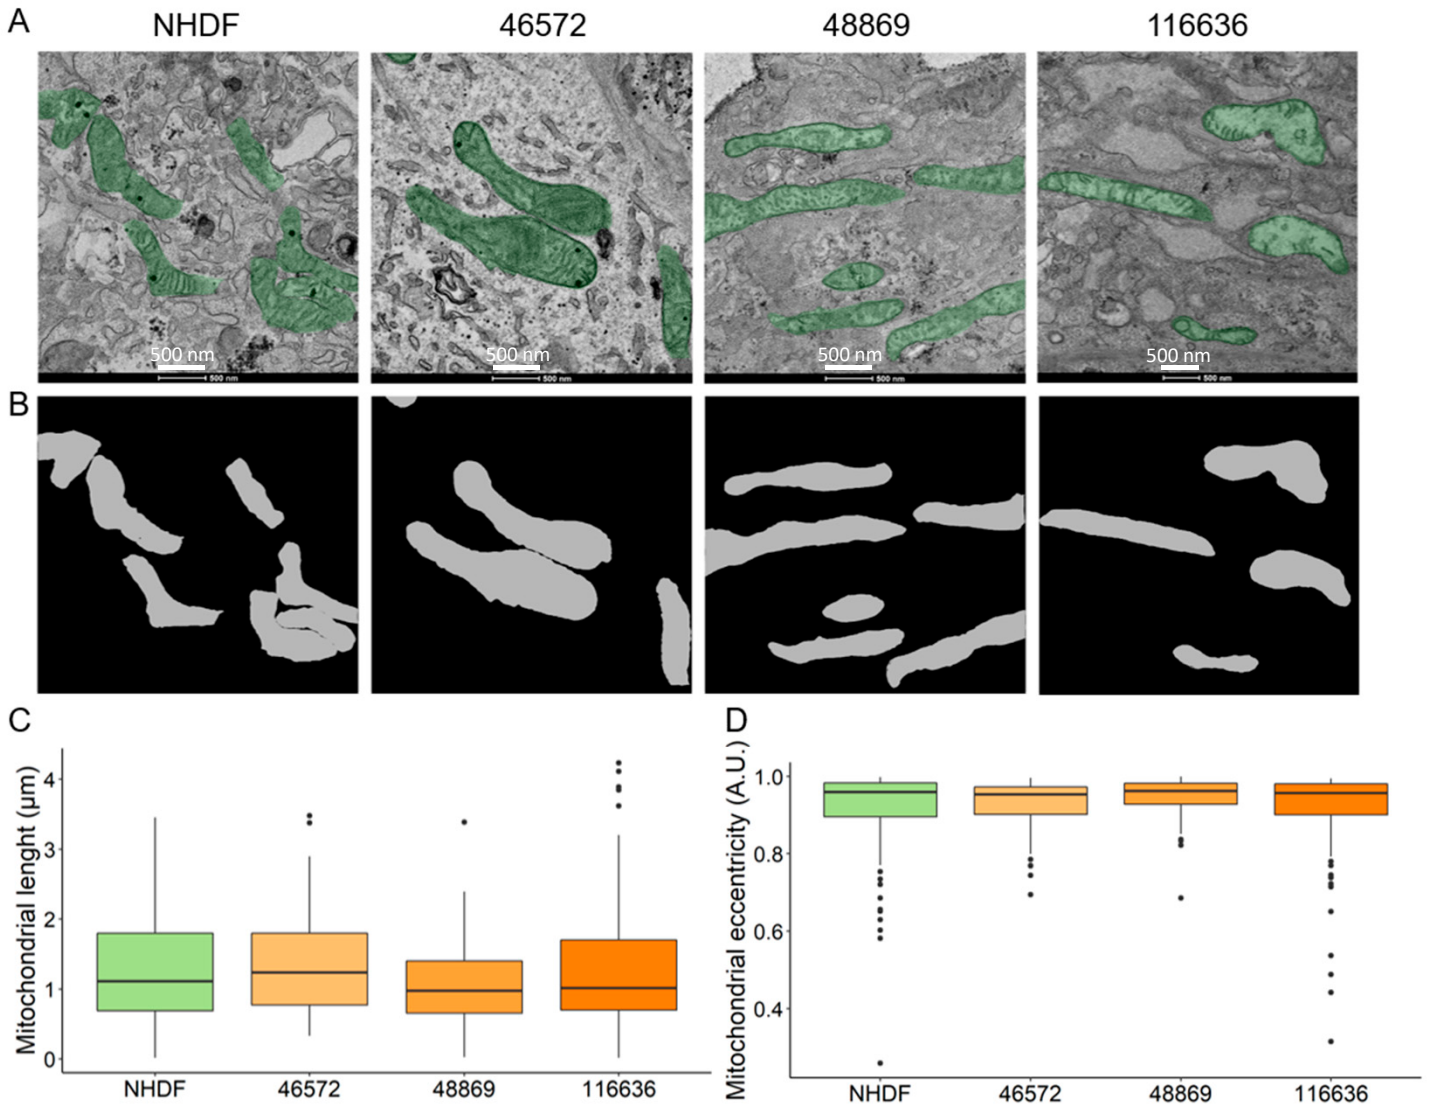

**Figure S4. Evaluation of the mitochondrial morphology in MPAN fibroblasts.** Representative pictures of electron microscopy sections from healthy fibroblast line (NHDF) and C19orf12<sup>T11M/G69Rfs\*10</sup> (46572), C19orf12<sup>D18G/L132Q</sup> (48869) and C19orf12<sup>G69Rfs\*10/G69Rfs\*10</sup> (116636) fibroblasts in Epon resin. Mitochondria are labeled in green (A). Grey masks were used to extract the mitochondrial descriptors (B). Box plots reporting the quantification of mitochondrial length (C) and eccentricity (D) extracted from the mitochondrial masks. Numbers of replicates: patients n=252; NHDF n=162. p values were calculated with Kruskal-Wallis statistical test. All p values were two-sided with a significance level of 0.05.

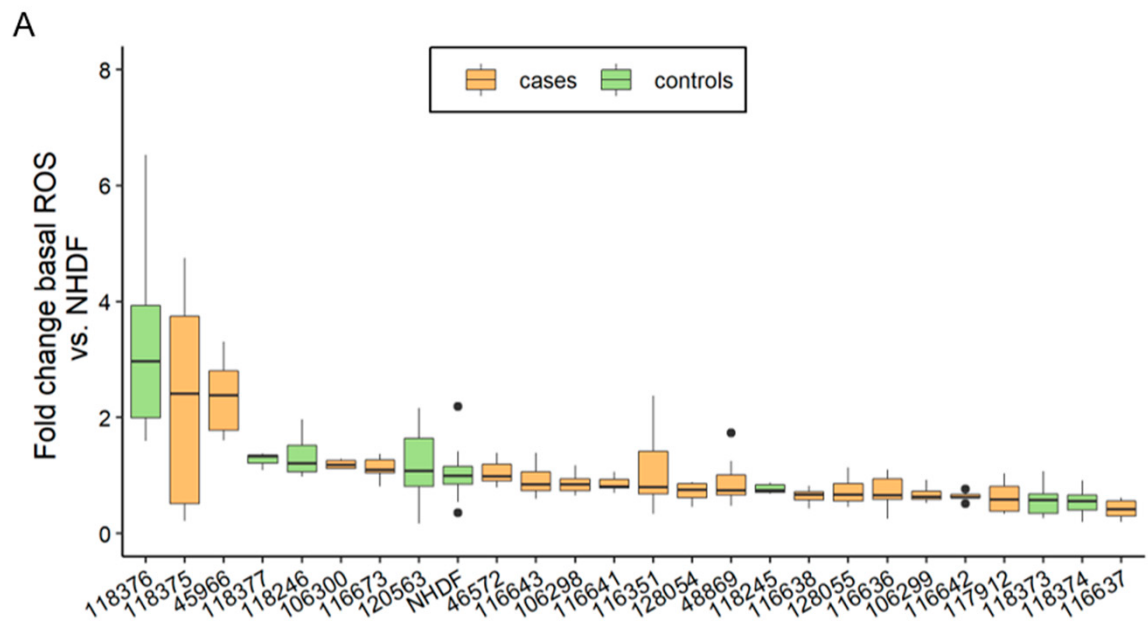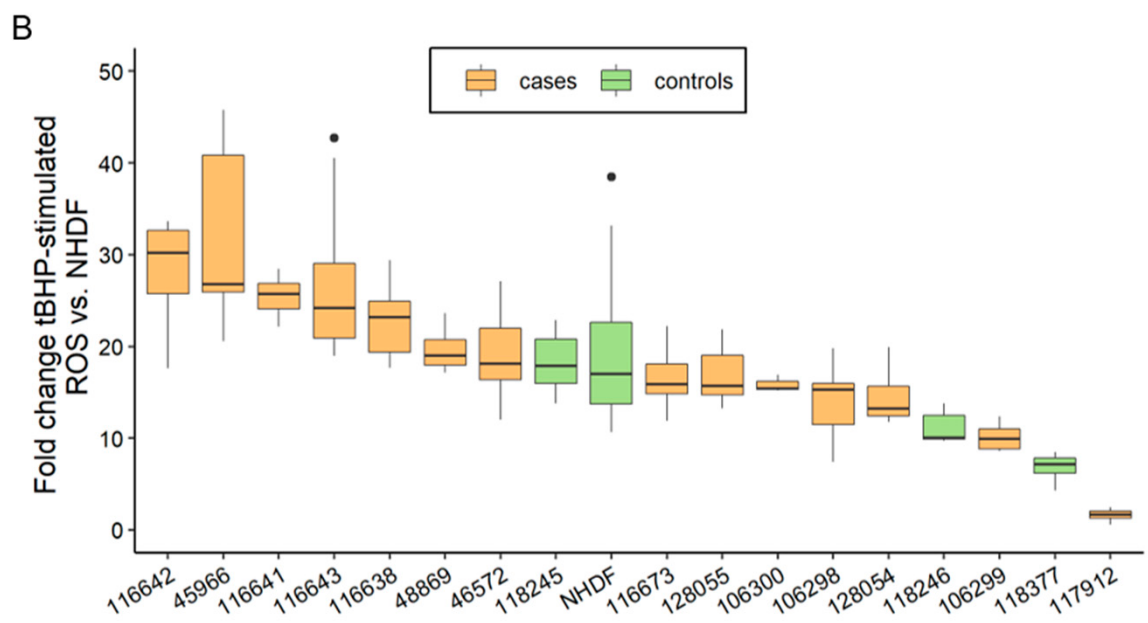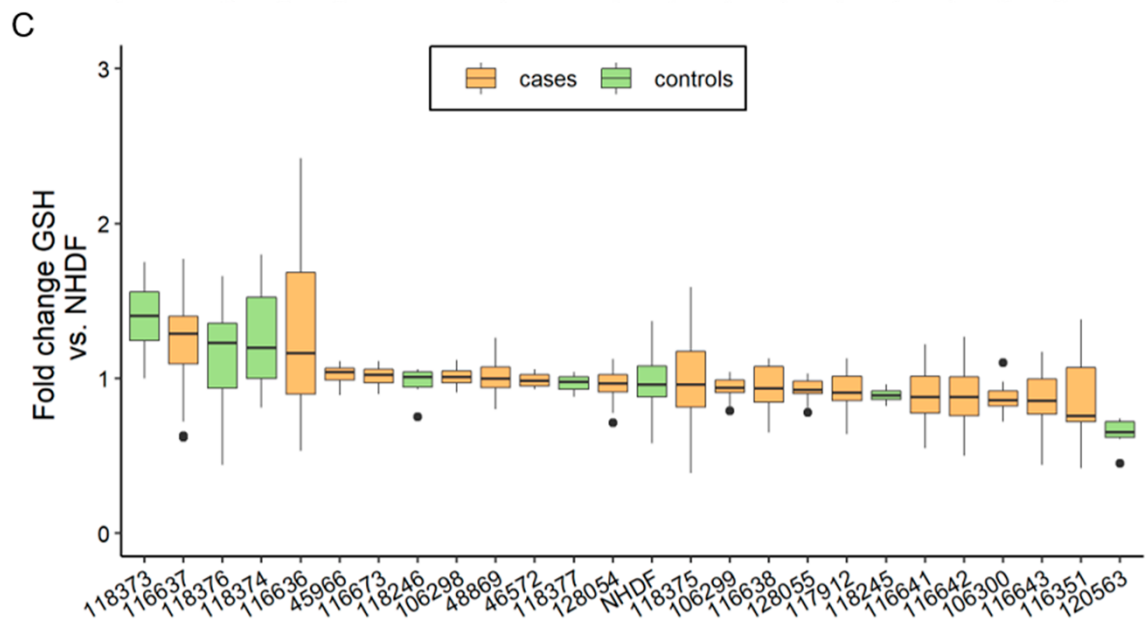

**Figure S5. Intracellular ROS and GSH levels in individual fibroblasts. ROS (A,B).** Box plots refer to individual cell line values of relative fluorescence. Relative ROS fold changes in patients and controls are normalized to the protein-normalized average fluorescence of NHDF cells in standard growth conditions. Data are presented by decreasing medians before (A) and after tBHP stimulation (B). **GSH (C).** Relative GSH fold changes in patients and controls are normalized to the protein-normalized average fluorescence of NHDF cells. Numbers of replicates: patients and carriers n=10-40; NHDF n=50. p values were calculated with an independent sample t-test. All p values were two-sided with a significance level of 0.05.

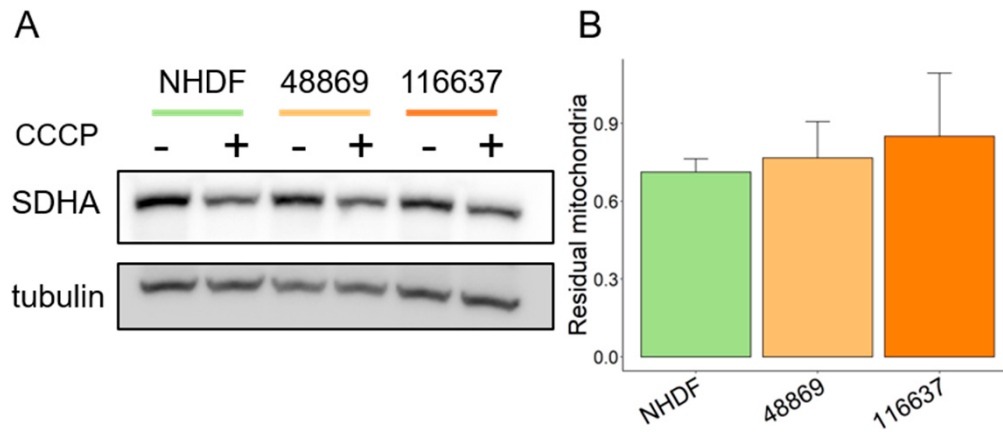

**Figure S6. Residual mitochondrial succinate dehydrogenase (SDH) protein level upon CCCP treatment.** Representative western blot analysis of protein expression of SDH, subunit A, (SDHA), and tubulin in control (NHDF) C19orf12<sup>D18G/L132Q</sup> (48869) and C19orf12<sup>G69Rfs\*10/G69Rfs\*10</sup> (116637) fibroblasts upon treatment with 20  $\mu$ M CCCP for 24 hours. Actin was used as a loading control. 10  $\mu$ g proteins of cellular lysates were loaded (A). Actin was used as a loading control. 10  $\mu$ g proteins of cellular lysates were loaded. Relative abundance of SDHA in cells treated with CCCP vs. untreated cells (B). Chemiluminescent protein signals were quantified using ImageJ. n = 4 independent experiments were considered for the quantification. Data were analyzed with unpaired two-tailed t-test; \*p < 0.05.

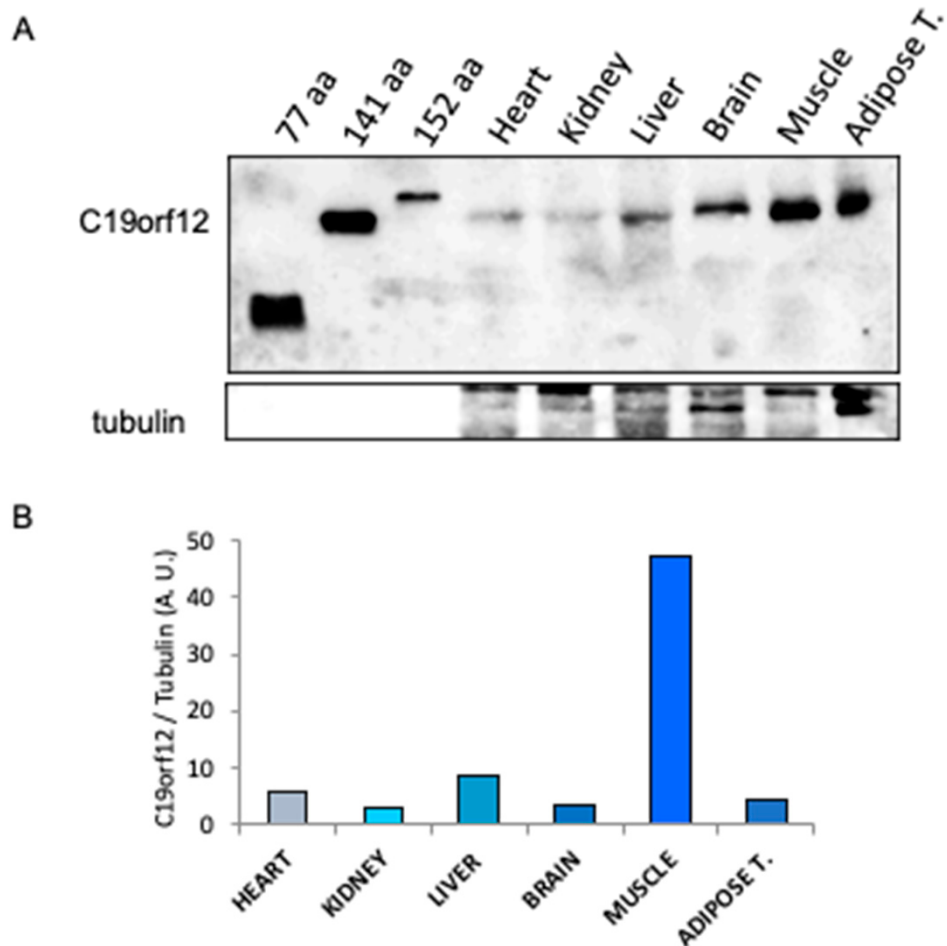

**Figure S7. C19orf12 expression in human tissues.** (A) Representative western blot analysis of C19orf12 expression in tissue lysates. Recombinant C19orf12 proteins (77, 141, 152 aa) were used as molecular weight references besides the protein ladder. Tubulin was used as a loading control. The following amounts of proteins were loaded; 60  $\mu$ g of tissue lysates; 1.5 ng of 77aa; 0.9 ng of 141aa; 0.3 ng of 152 aa. (B) Relative quantification of C19orf12 expression to tubulin.

**Table S2. List of compounds screened in MPAN fibroblasts.** From left to right, columns indicate in order: 1. List of the fourteen compounds used in the current study; 2. SMILES descriptors; 3. Working concentration of each compound in cell culture medium; 4. Effect of the compound on LC3 puncta modulation in the current study; 5. Effect of the compound on LC3 based on the literature 6. Literature references for selected compounds.

| Compounds screened       | SMILES                                                                                                                                 | Final concentration | Effects on LC3-II levels | Effect on autophagy based on literature | Literature reference (PMID) |
|--------------------------|----------------------------------------------------------------------------------------------------------------------------------------|---------------------|--------------------------|-----------------------------------------|-----------------------------|
| Clomipramine             | <chem>CN(C)CCCN1C2=C(CCC3=C1C=C(Cl)C=C3)C=CC=C2</chem>                                                                                 | 10µM                | -                        | Inhibition                              | 19706685                    |
| Oridonin                 | <chem>CC1(C)CCC(O)[C@]23CO[C@@](O)(C(O)[C@H]12)[C@@]12C(O)C(CC[C@@H]31)C(=C)C2=O</chem>                                                | 2µg/µL              | Increase                 | Induction                               | 17895587                    |
| Paroxetine               | <chem>FC1=CC=C(C=C1)C1CCNC1COC1=CC=C2OCOC2=C1</chem>                                                                                   | 10µM                | Increase                 | Induction, Inhibition                   | 28465217, 32039209          |
| Phenethyl isothiocyanate | <chem>S=C=NCCC1=CC=CC=C1</chem>                                                                                                        | 2µM                 | decrease. Toxic to cells | Induction                               | 19336571                    |
| ABT-737                  | <chem>CN(C)CC[C@H](CSC1=CC=CC=C1)NC1=CC=C(C=C1[N+])([O-])=O)S(=O)(=O)NC(=O)C1=CC=C(C=C1)N1CCN(CC2=C(C=CC=C2)C2=CC=C(Cl)C=C2)CC1</chem> | 10µM                | Increase                 | Induction                               | 17446862                    |
| Lonafarnib               | <chem>NC(=O)N1CCC(CC(=O)N2C(CC(C2)[C@H]2C3=C(CCC4=C2C(Br)=CC(Cl)=C4)C=C(Br)C=N3)CC1</chem>                                             | 10µM                | Decrease                 | Induction                               | 18769123                    |
| LY294002                 | <chem>O=C1C=C(OC2=C(C=CC=C12)C1=CC=CC=C1)N1CCOC1</chem>                                                                                | 10µM                | Increase                 | Induction, Inhibition                   | 18330473, 9030745           |
| Trazodone                | <chem>C1C1=CC(=CC=C1)N1CCN(CCCN2N=C3C=CC=CN3C2=O)CC1</chem>                                                                            | 10µM                | -                        | Induction                               | 35781619                    |
| DL-Sulforaphane          | <chem>CS(=O)CCCCN=C=S</chem>                                                                                                           | 10µM                | -                        | Induction, Inhibition                   | 24383989, 32476238          |
| Dacinostat; LAQ824       | <chem>OCCN(CCC1=CNC2=CC=C(C=C12)CC1=CC=C(C=CC(=O)NO)C=C1</chem>                                                                        | 10µM                | -                        | Induction                               | 19383971                    |
| Selegiline               | <chem>C[C@H](CC1=CC=CC=C1)N(C)CC#C</chem>                                                                                              | 10µM                | -                        | Inhibition                              | 26342896                    |
| Carbamazepine            | <chem>NC(=O)N1C2=C(C=CC=C2)C=CC2=C1C=CC=C2</chem>                                                                                      | 10µM                | Increase                 | Induction                               | 23305067, 34432315          |
| Concanavalin A           |                                                                                                                                        | 2µg/µL              | -                        | Induction                               | 17256764                    |
| Linoleic acid            | <chem>CH3(CH2)4CH=CHCH2CH=CH(CH2)7CO2H</chem>                                                                                          | 10µM                | Decrease                 | Induction                               | 32732901                    |
